# Supplementary material for: Multi-functional perovskite oxide Pr0.6Sr0.4Mn0.2Fe0.7Ni0.1O3−δ as an efficient quasi-symmetric electrode for solid oxide fuel/electrolysis cells
Source: Royal Society of Chemistry journal article supplement (doi:10.1039/d3ta08110a), 2024-01-01
Supplement: d3ta08110a1.pdf [file d3ta08110a1.pdf]

## Supporting Information

# Multi-Functional Perovskite Oxide $\text{Pr}_{0.6}\text{Sr}_{0.4}\text{Mn}_{0.2}\text{Fe}_{0.7}\text{Ni}_{0.1}\text{O}_{3-\delta}$ as an Efficient Quasi-Symmetric Electrode for Solid oxide Fuel/Electrolysis Cells

Junil Choi<sup>a</sup>, Daehee Jang<sup>a</sup>, Minho Kim<sup>a</sup>, Jungseub Ha<sup>a</sup>, Hwicheon Ahn<sup>a</sup>, and Won Bae Kim<sup>a, b, \*</sup>

<sup>a</sup> Department of Chemical Engineering, Pohang University of Science and Technology (POSTECH), 77 Cheongam-ro, Nam-gu, Pohang, Gyeongbuk, 37673, Republic of Korea

<sup>b</sup> Graduate Institute of Ferrous & Energy Materials Technology, Pohang University of Science and Technology (POSTECH), 77 Cheongam-ro, Nam-gu, Pohang, Gyeongbuk 37673, Republic of Korea

\*Corresponding authors

E-Mail addresses: [kimwb@postech.ac.kr](mailto:kimwb@postech.ac.kr)

**Table S1.** Peak power density (PPD) comparison of symmetric electrodes in H<sub>2</sub>-operated

| Material                                                                                                                                                       | Electrolyte     | Cell configuration               | PPD<br>(W cm <sup>-2</sup> ) |                  | Ref          |
|----------------------------------------------------------------------------------------------------------------------------------------------------------------|-----------------|----------------------------------|------------------------------|------------------|--------------|
|                                                                                                                                                                |                 |                                  | Gas                          | Value<br>(Temp.) |              |
| (La <sub>0.8</sub> Sr <sub>0.2</sub> ) <sub>0.9</sub> Sc <sub>0.2</sub> Mn <sub>0.75</sub> Ru <sub>0.05</sub> O <sub>3-δ</sub><br>(LSCMR)                      | SSZ<br>(200μm)  | LSSMR SSZ LS<br>SMR              | wet H <sub>2</sub>           | 0.318<br>(800°C) | [1]          |
| Sr <sub>2</sub> Ti <sub>0.8</sub> Co <sub>0.2</sub> FeO <sub>6</sub><br>(STCF)                                                                                 | LSGM<br>(270μm) | STC02F LSGM <br>STC02F           | dry H <sub>2</sub>           | 0.555<br>(800°C) | [2]          |
| La <sub>0.6</sub> Sr <sub>0.4</sub> Fe <sub>0.95</sub> Ru <sub>0.05</sub> O <sub>3-δ</sub><br>(LSFRu)                                                          | LSGM<br>(300μm) | LSGMR05 LSG<br>M LSGMR05         | dry H <sub>2</sub>           | 602<br>(850°C)   | [3]          |
| La <sub>0.5</sub> Sr <sub>0.5</sub> Fe <sub>0.9</sub> W <sub>0.1</sub> O <sub>3-δ</sub><br>(LSFW)                                                              | LSGM<br>(250μm) | LSFW LSGM LS<br>FW               | wet H <sub>2</sub>           | 0.618<br>(800°C) | [4]          |
| Ce <sub>0.2</sub> Sr <sub>0.8</sub> Fe <sub>0.95</sub> Ru <sub>0.05</sub> O <sub>3</sub><br>(CeSFR)                                                            | LSGM<br>(320μm) | Ce20SFR LSGM <br>Ce20SFR         | dry H <sub>2</sub>           | 0.846<br>(800°C) | [5]          |
| Pr <sub>0.6</sub> Sr <sub>0.4</sub> Fe <sub>0.8</sub> Mn <sub>0.2</sub> O <sub>3-δ</sub> - Ce <sub>0.9</sub> Gd <sub>0.1</sub> O <sub>2-δ</sub><br>(PSMFN-GDC) | LSGM<br>(300μm) | PSMFN-<br>GDC LSGM PS<br>MFN-GDC | dry H <sub>2</sub>           | 602<br>(850°C)   | This<br>work |

SOFC

| Material                                                                                                                                                                            | Electrolyte     | Cell configuration             | Current density (A cm <sup>-2</sup> ) |                        | Ref       |
|-------------------------------------------------------------------------------------------------------------------------------------------------------------------------------------|-----------------|--------------------------------|---------------------------------------|------------------------|-----------|
|                                                                                                                                                                                     |                 |                                | Gas                                   | Value (Temp., Voltage) |           |
| La <sub>0.4</sub> Sr <sub>0.6</sub> Co <sub>0.2</sub> Fe <sub>0.7</sub> Nb <sub>0.1</sub> O <sub>3-δ</sub><br>(LSCFNb)                                                              | YSZ<br>(200μm)  | LSCFN-GDC YSZ LSCFN-GDC        | 30%<br>CO/CO <sub>2</sub>             | 0.4<br>(800°C, 1.5V)   | [6]       |
| La <sub>0.6</sub> Sr <sub>0.4</sub> Fe <sub>0.95</sub> Pt <sub>0.05</sub> O <sub>3-δ</sub><br>(Fe@LSPt)                                                                             | LSGM<br>(300μm) | LSPt LSGM LSPt                 | 50%<br>CO/CO <sub>2</sub>             | 0.65<br>(850°C, 1.5V)  | [7]       |
| (La,Sr)Fe <sub>0.9</sub> Ni <sub>0.1</sub> O <sub>4+δ</sub> (RPLSFN0.1)                                                                                                             | LSGM<br>(300μm) | RPLSFN0.1 LSGM RPLSFN0.1       | 50%<br>CO/CO <sub>2</sub>             | 0.75<br>(800°C, 1.5V)  | [8]       |
| La <sub>0.8</sub> Sr <sub>0.2</sub> Cr <sub>0.5</sub> Fe <sub>0.5</sub> O <sub>3-δ</sub> -Zr <sub>0.84</sub> Y <sub>0.16</sub> O <sub>2-δ</sub><br>(LSCrF-YSZ)                      | YSZ<br>(200μm)  | LSCrF-YSZ YSZ LSCrF-YSZ        | 30%<br>CO/CO <sub>2</sub>             | 0.75<br>(850°C, 1.5V)  | [9]       |
| La <sub>0.65</sub> Bi <sub>0.1</sub> Sr <sub>0.25</sub> Cr <sub>0.5</sub> Fe <sub>0.5</sub> O <sub>3-δ</sub> -Ce <sub>0.8</sub> Sm <sub>0.2</sub> O <sub>1.9</sub><br>(LBiSCrF-SDC) | LSGM<br>(330μm) | Bi-LSCrF-SDC LSGM Bi-LSCrF-SDC | 50%<br>CO/CO <sub>2</sub>             | 0.79<br>(800°C, 1.5V)  | [10]      |
| Pr <sub>0.6</sub> Sr <sub>0.4</sub> Fe <sub>0.8</sub> Mn <sub>0.2</sub> O <sub>3-δ</sub> -Ce <sub>0.9</sub> Gd <sub>0.1</sub> O <sub>2-δ</sub><br>(PSMFN-GDC)                       | LSGM<br>(300μm) | PSMFN-GDC LSGM PSMFN-GDC       | 30%<br>CO/CO <sub>2</sub>             | 1.02<br>(850°C, 1.5V)  | This work |

**Table S2.** Current density comparison of symmetric electrodes for CO<sub>2</sub> electrolysis in SOEC.

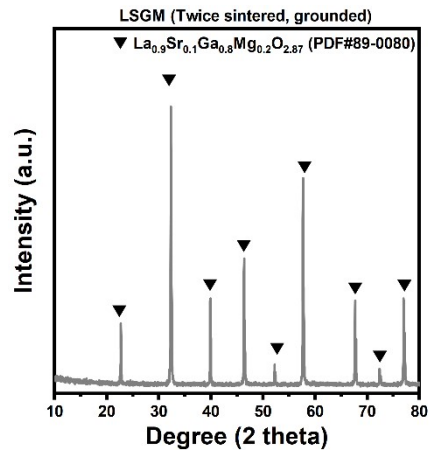

**Fig. S1.** XRD pattern of grounded twice-sintered LSGM pellet.

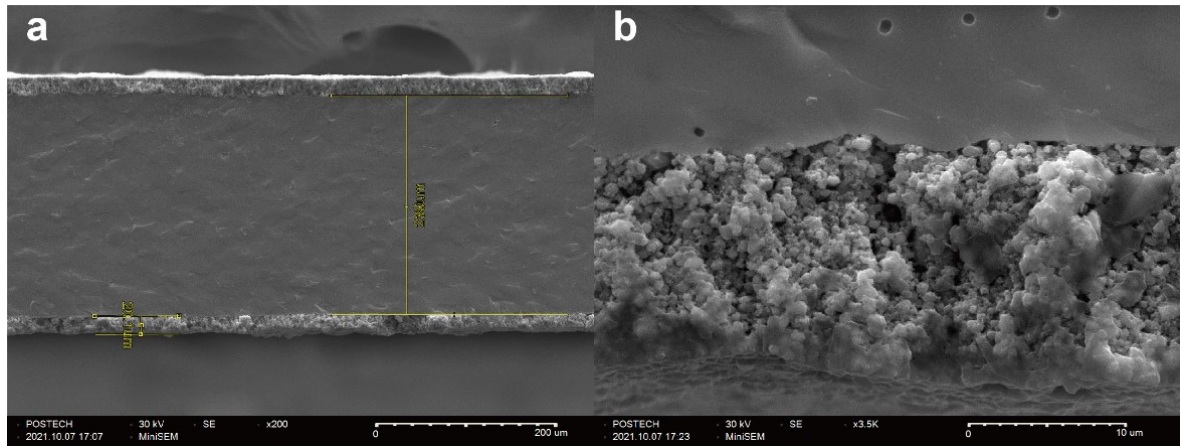

**Fig S2.** The Cross-sectional SEM images of (a) PSMFN-GDC symmetrical cell based on LSGM electrolyte and (b) magnified electrode.

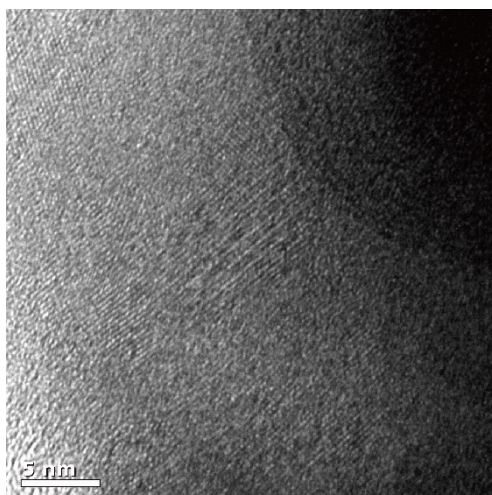

**Fig S3.** HR-TEM image of reduced PSMFN.

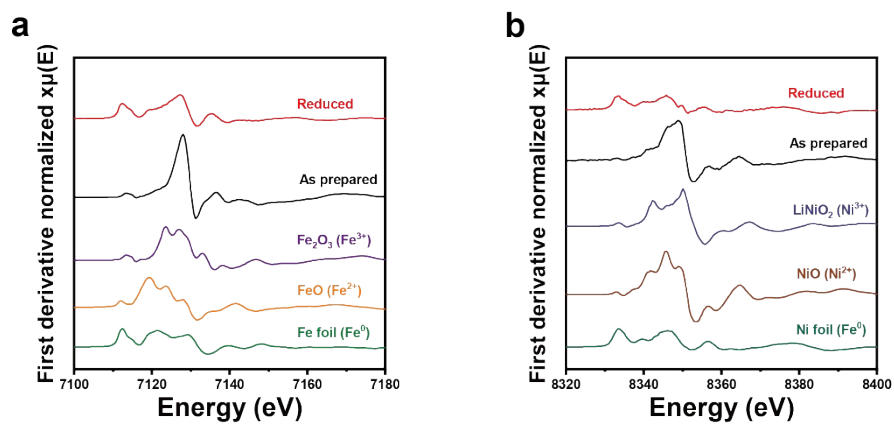

**Figure S4.** The 1<sup>st</sup> derivative curves of XAENS spectra of PSMFN, reduced PSMFN and corresponding reference oxides at (a) Fe-K edge and (b) Ni K-edge

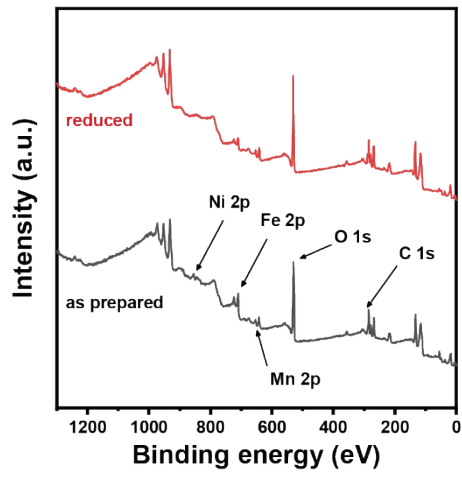

**Figure S5.** XPS surveys of the as prepared and reduced PSMFN



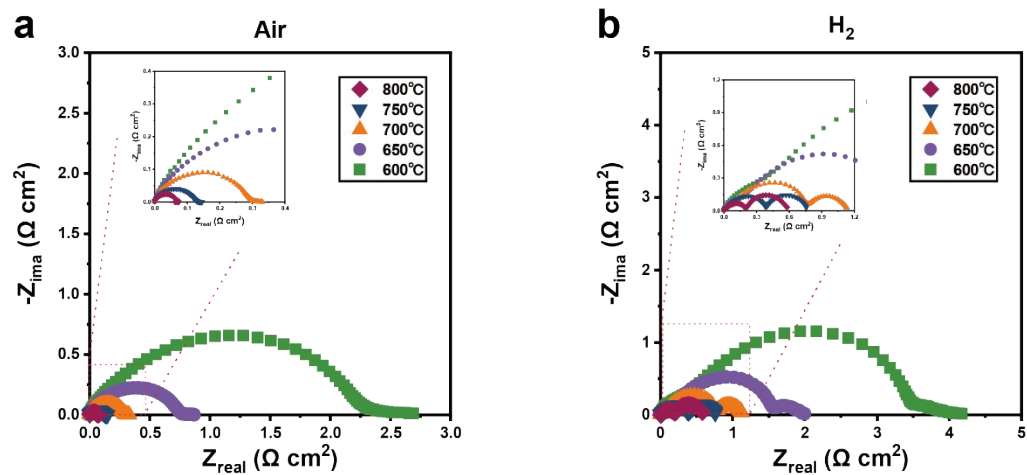

**Figure S6.** Symmetric half-cell tests of PSMFN-GDC under (a) air and (b)  $\text{H}_2$  atmosphere.

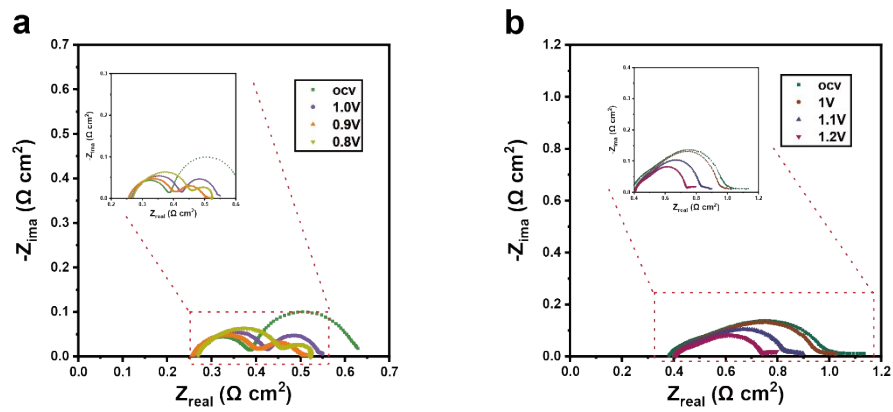

**Figure S7.** EIS profiles of PSMFN-GDC symmetric cell under applied voltage conditions in (a) SOFC mode and (b) SOEC mode

## References

- [1] J. Zhou, N. Wang, J. Cui, J. Wang, J. Yang, Z. Zong, Z. Zhang, Q. Chen, X. Zheng, K. Wu, *J. Alloys Compd.*, 2019, **792**, 1132–1140.
- [2] B. Niu, C. Lu, W. Yi, S. Luo, X. Li, X. Zhong, X. Zhao, B. Xu, *Appl. Catal. B*, 2020, **270**, 118842.
- [3] M. Marasi, L. Duranti, I. Luisetto, E. Fabbri, S. Licocchia, E. Di Bartolomeo, *J. Power Sources*, 2023, **555**, 232399.
- [4] S. Wang, B. Wei, Z. Lü, *Int. J. Hydrogen Energy*, 2021, **46**, 30101–30111.
- [5] B. Li, S. He, J. Li, X. Yue, J.T.S. Irvine, D. Xie, J. Ni, C. Ni, *ACS Catal.*, 2020, **10**, 14398–14409.
- [6] Z. Yang, C. Ma, N. Wang, X. Jin, C. Jin, S. Peng, *J. CO2 Util.*, 2019, **33**, 445–451.
- [7] A.P. Panunzi, L. Duranti, I. Luisetto, N. Lisi, M. Marelli, E. Di Bartolomeo, *Chem. Eng. J.*, 2023, **471**, 144448.
- [8] C. Liu, C. Sun, L. Bian, W. Yu, J. Qi, S. Li, J. Gao, J. Peng, J. Peng, S. An, *Int. J. Hydrogen Energy*, 2022, **47**, 9517–9526.
- [9] S. Xu, S. Li, W. Yao, D. Dong, K. Xie, *J. Power Sources*, 2013, **230**, 115–121.
- [10] Y. Wan, Y. Yang, Y. Lu, R. Peng, C. Xia, *ACS Appl. Energy Mater.*, 2022, **5**, 2339–2348.
